# Supplementary material for: Glucocorticoid-temperature association is shaped by foraging costs in individual zebra finches
Source: Oxford University Press journal article supplement (doi:10.1242/jeb.187880), 2018-01-01
Supplement: jeb187880supp.pdf [file jeb187880supp.pdf]

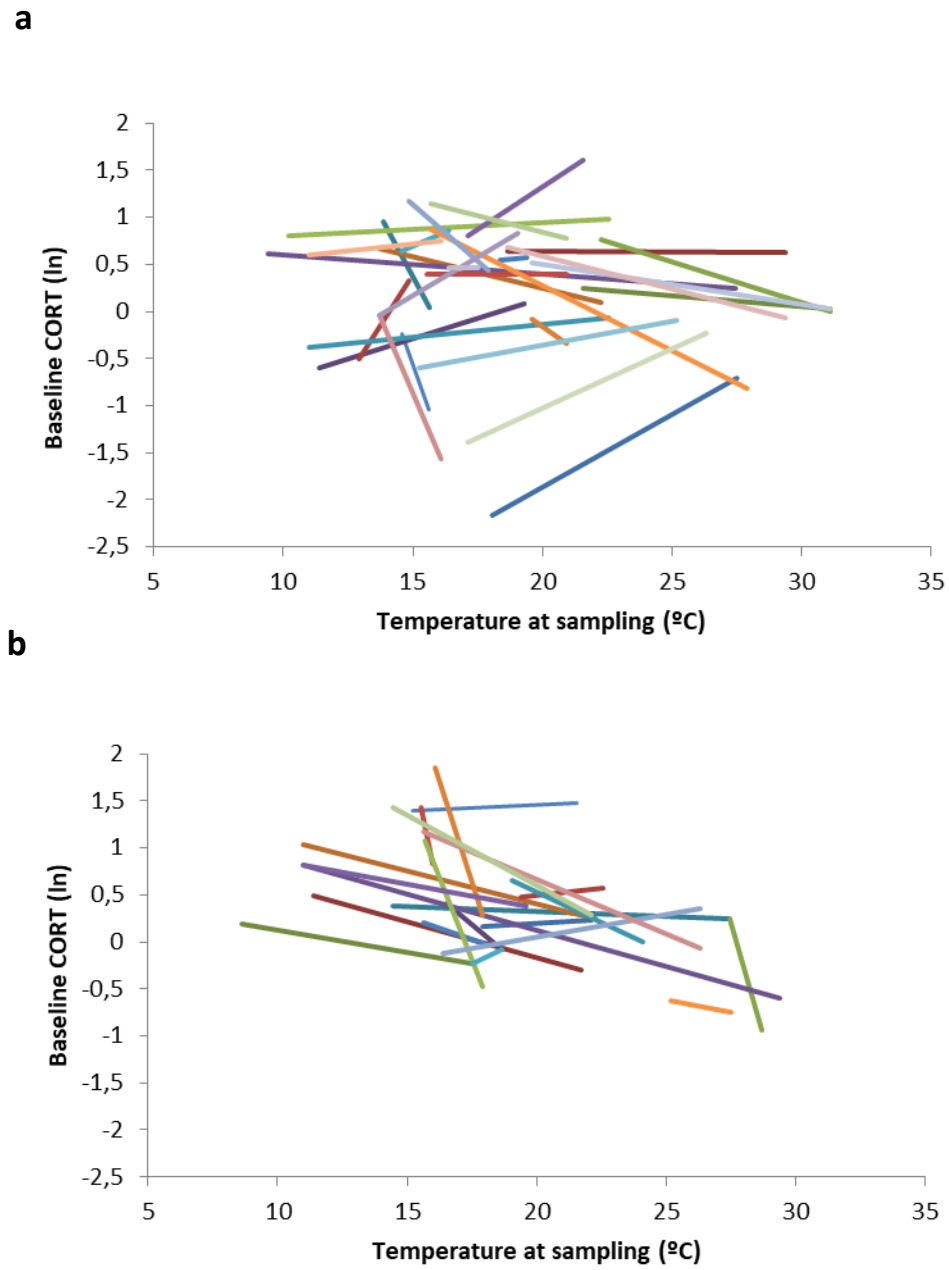

Fig. S1: Baseline CORT and ambient temperature at sampling of individual zebra finches in (a) easy (N=28) and (b) hard (N=21) foraging environment.
